# Supplementary material
Source: publisher figshare collection journal article supplement (https://acs.figshare.com/ndownloader/files/20179286)
Supplement: Supplementary file 1 [file 20179286]

## Supporting Information

### Improved *in-situ* synthesis of hetero-structured 2D/2D BiOCl/g-C<sub>3</sub>N<sub>4</sub> with enhanced dyes photodegradation under visible-light illumination

Wei Cai,<sup>†,‡,\*</sup> Jiayu Tang,<sup>‡</sup> Yunpeng Shi,<sup>‡</sup> Hu Wang,<sup>†</sup> and Xiaoming Jiang<sup>†</sup>

<sup>†</sup> Datang Nanjing Environmental Protection Technology Co, Ltd, Nanjing 21111, PR China

<sup>‡</sup> School of Environmental Science and Engineering, Nanjing University of Information Science & Technology, Nanjing, 210044, P.R. China

| Table of Contents |                                                                                                                                    |       |
|-------------------|------------------------------------------------------------------------------------------------------------------------------------|-------|
| Sections          | Titles                                                                                                                             | Pages |
| Figure S1         | N <sub>2</sub> -isotherms of sole BiOCl, sole g-C <sub>3</sub> N <sub>4</sub> and BiOCl/g-C <sub>3</sub> N <sub>4</sub> composites | S2    |
| Figure S2         | EDS analysis of B2C1 sample                                                                                                        | S3    |
| Figure S3         | Elemental mapping images of B2C1 sample                                                                                            | S4    |
| Figure S4         | Photodegradation of RhB stability test over B2C1 sample under visible-light illumination                                           | S5    |

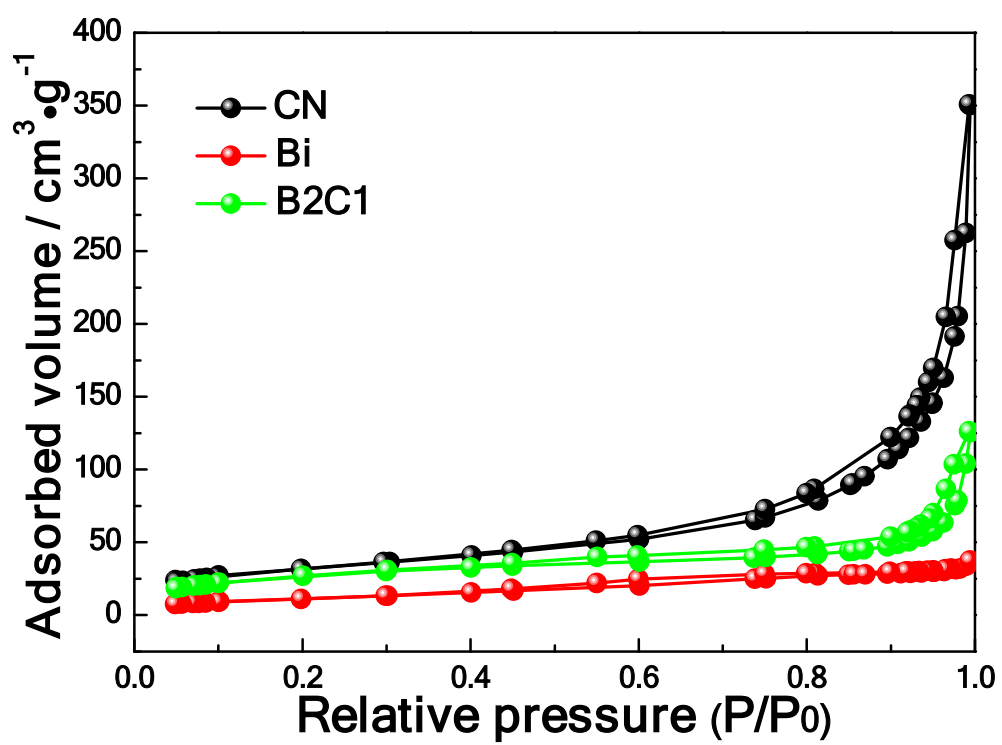

**Figure S1.** N<sub>2</sub>-isotherms of sole BiOCl, sole g-C<sub>3</sub>N<sub>4</sub> and BiOCl/g-C<sub>3</sub>N<sub>4</sub> composites.

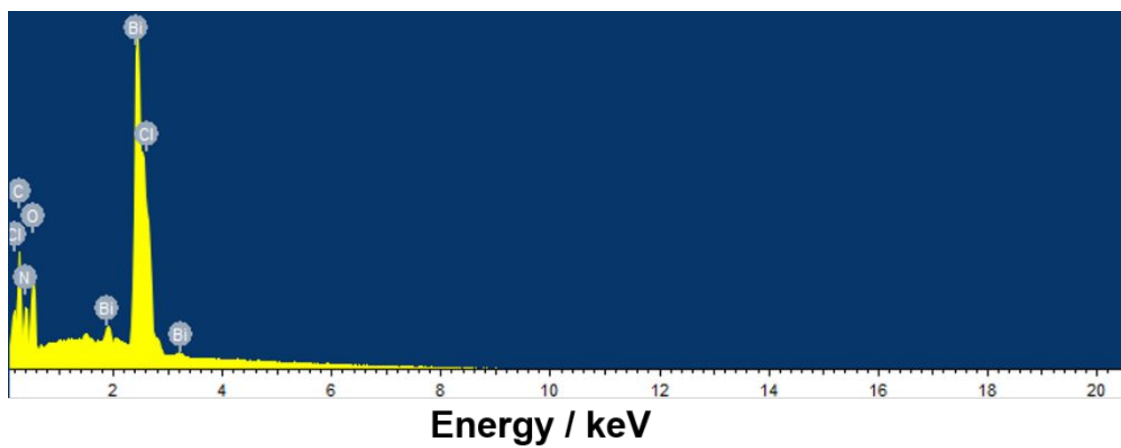

**Figure S2.** EDS analysis of B<sub>2</sub>C<sub>1</sub> sample.

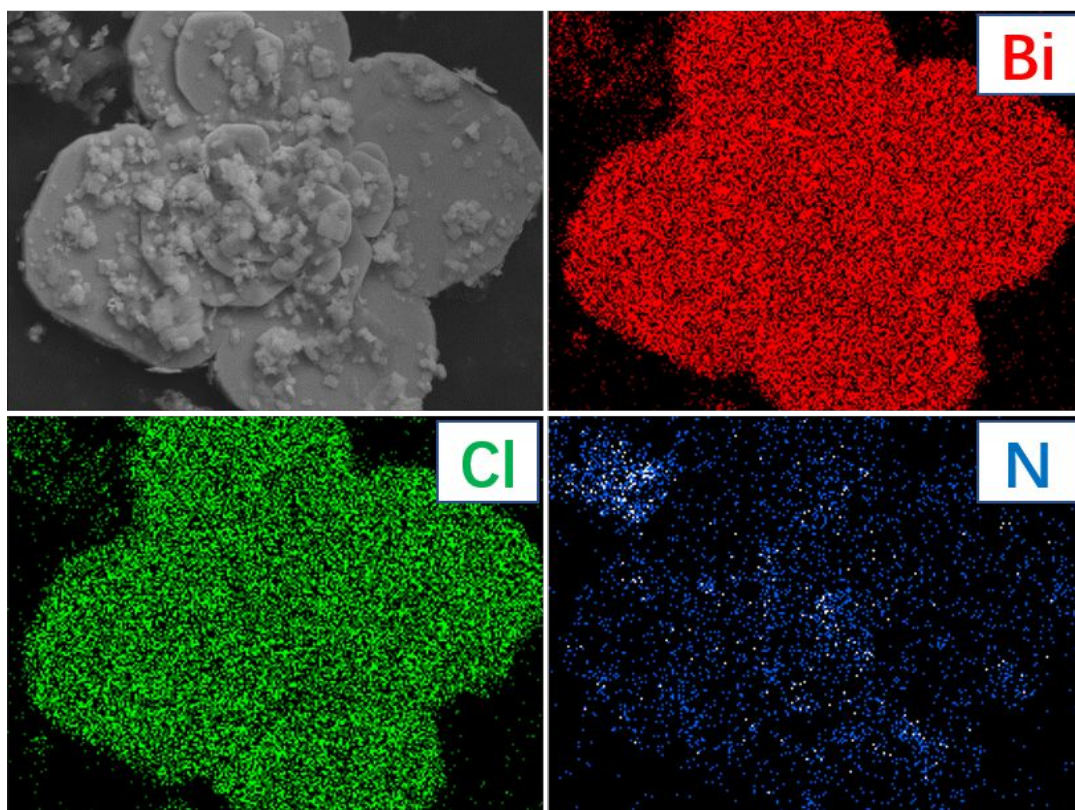

**Figure S3.** Elemental mapping images of B2C1 sample.

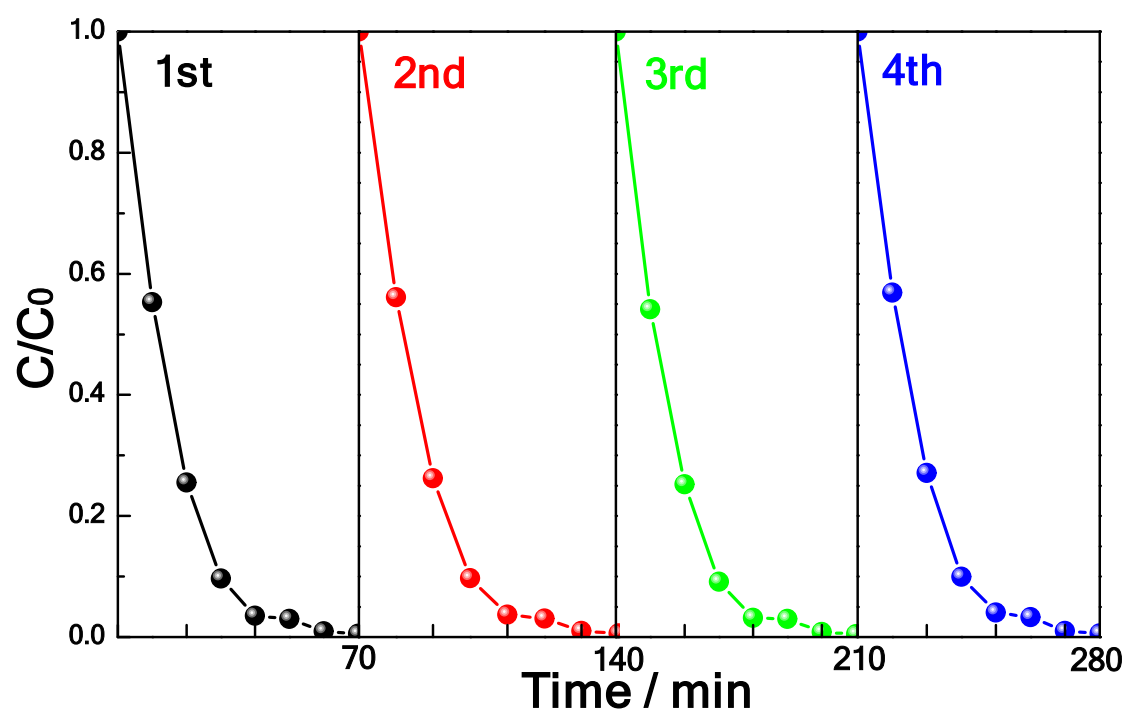

**Figure S4.** Photodegradation of RhB stability test over B2C1 sample under visible-light illumination.
